# Supplementary material for: Role of Berberine as a Potential Efflux Pump Inhibitor against MdfA from Escherichia coli: In Vitro and In Silico Studies
Source: PubMed Central journal article supplement (PMC10100983; doi:10.1128/spectrum.03324-22), 2023-02-14
Supplement: spectrum.03324-22-s0001.pdf [file spectrum.03324-22-s0001.pdf]

Supplemental Table 1. Primers used in this work.

| Name          | Sequence                                                           |
|---------------|--------------------------------------------------------------------|
| mdfa-F        | 5'-tagaaataattttgttaactttaagaaggagatatacccatgcaaaataaattagcttc-3'  |
| mdfa-R        | 5'-ggccccaaggggttatgctagtattgctcagcgggcccctacccttcgtgagaatttc-3'   |
| mdfa-18sac-1F | 5'-ccaagcttgcatgcctgcaggtcgactctagaggatccccgcaaagatgttttaatggc-3'  |
| mdfa-18sac-1R | 5'-gattattattggcgaagaatgcaaaaaatgcctgattgctttgtgcg-3'              |
| mdfa-18sac-2F | 5'-cgcacaagcaatcaggcattttttgcaatttctcgccaataataatc-3'              |
| mdfa-18sac-2R | 5'-aacagctatgaccatgattacgaattcgagctcggtacccttatcgctgctgttaattc-3'  |
| mdfa-rhab-1F  | 5'-gctcaaattggaatcaggtttgtgccaataaccagtagcccgcaaagatgttttaatggc-3' |
| mdfa-check-F  | 5'-cctgatcgcaaaagcaatcaggca-3'                                     |
| mdfa-check-R  | 5'-ttaaactctgcgattattattgg-3'                                      |

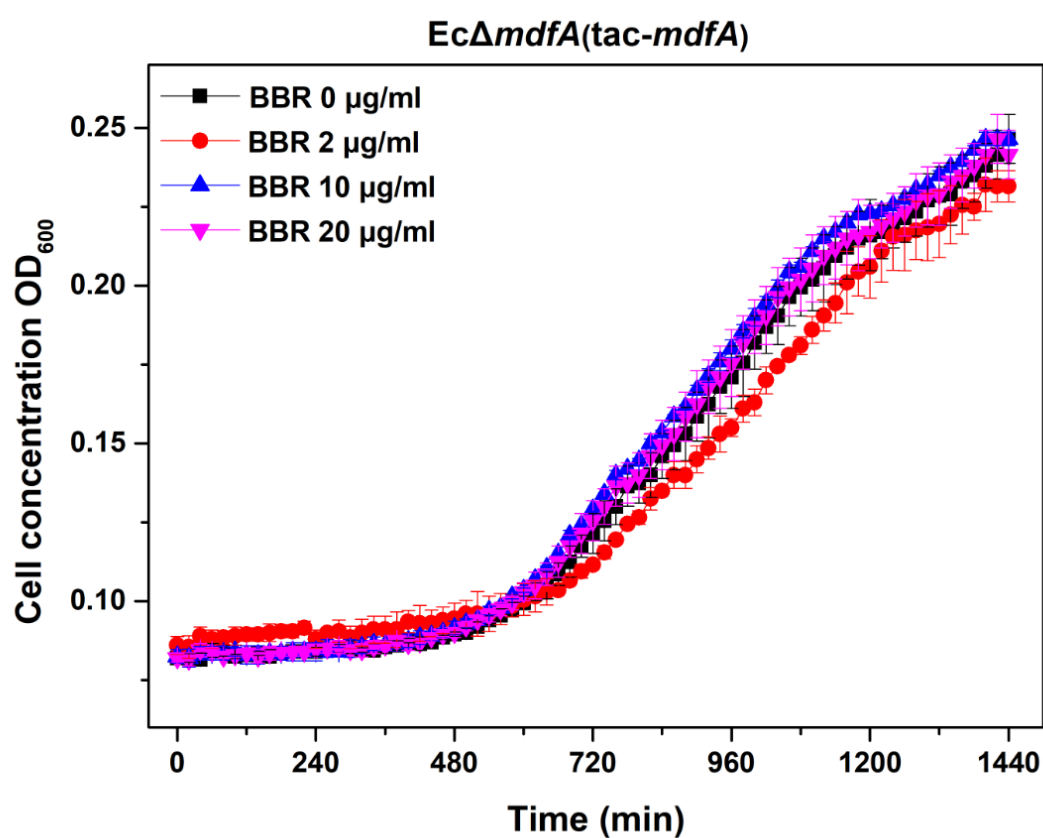

Figure S1. Low levels of BBR had no effect on cell growth of the reporter strain. Cell growth curve was obtained from a plate reader. All the experiments were conducted with at least three biological replicates. Data were presented at mean values  $\pm$  standard error.

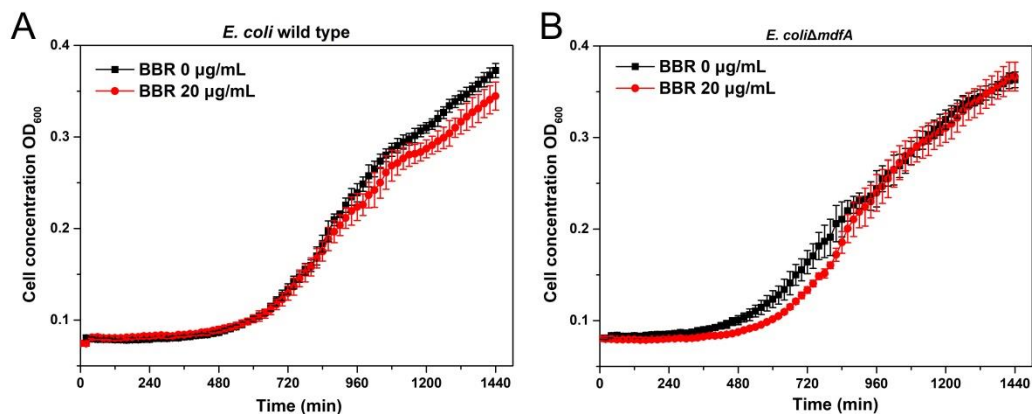

Figure S2. Low levels of BBR had no effect on cell growth of the wild type and the *mdfA* mutation strains. Cell growth curve was obtained from a plate reader. All the experiments were conducted with at least three biological replicates. Data were presented at mean values  $\pm$  standard error.

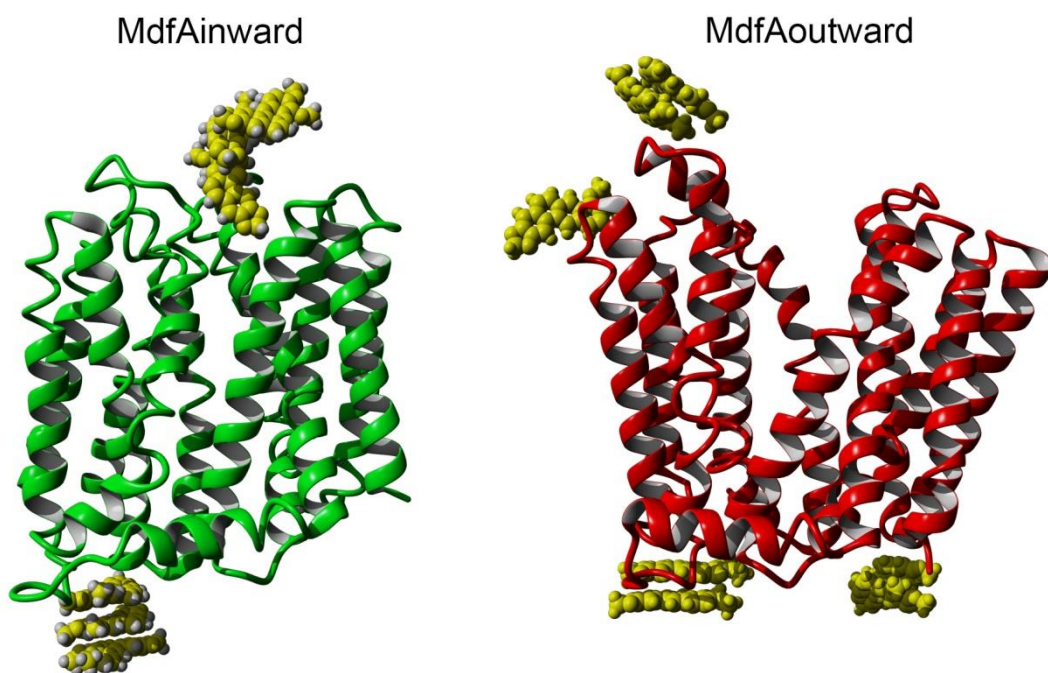

Figure S3. Visualization the interactions of  $MdfA^{inward}$  and  $MdfA^{outward}$  with BBR molecules in the simulation. Molecules colored yellow represent BBR.
